# Supplementary material for: Sulfated polysaccharides from pacific abalone attenuated DSS-induced acute and chronic ulcerative colitis in miceviaregulating intestinal micro-ecology and the NF-κB pathway
Source: Royal Society of Chemistry journal article supplement (doi:10.1039/d1fo02431k), 2021-01-01
Supplement: d1fo02431k1.pdf [file d1fo02431k1.pdf]

**Table s1** Disease activity index (DAI) evaluation criteria

| <b>Score</b> | <b>Percentage of weight loss (%)</b> | <b>Stool consistency</b> | <b>Blood in stools</b> |
|--------------|--------------------------------------|--------------------------|------------------------|
| 0            | 0                                    | Normal                   | Normal                 |
| 1            | 1-5                                  |                          |                        |
| 2            | 6-10                                 | Loose stool              | Occult blood           |
| 3            | 11-20                                |                          |                        |
| 4            | >20                                  | Diarrhea                 | Gross bleeding         |

**Table s2** Histological damage scoring system.

| <b>Parameters</b>                    | <b>Score</b> | <b>Histological features</b> |
|--------------------------------------|--------------|------------------------------|
| (i) Surface epithelial loss          | 0            | No change                    |
| (ii) Crypt destruction               | 1            | Localized and mild           |
|                                      | 2            | Localized and moderate       |
| (iii)Inflammatory cells infiltration | 3            | Extensive and moderate       |
|                                      | 4            | Extensive and severe         |

**Table s3** The primer sequences used in RT-PCR.

| <b>Gene</b>    | <b>Forward primer</b>     | <b>Reverse primer</b>      |
|----------------|---------------------------|----------------------------|
| IL-6           | TGGAAATGAGAAAAGAGTTGTGC   | CCAGTTTGGTAGCATCCATCA      |
| IL-1 $\beta$   | CACCCTGCAGCTGGA GAGT      | GACAAACCGCTTTTCCATCTTC     |
| TNF- $\alpha$  | AGCCCACGTCGTAGCAAACCACCAA | ACACCCATTCCCTTCACAGAGCAAT  |
| IL-10          | TACTCGGCAAACCTAGTGCG      | GTGTCCCAACATTCATAATTGTCAGT |
| $\beta$ -actin | TCAGCAAGCAGGAGTACGATG     | ACGCAGCTCAGTAACAGTCC       |

**Table s4** Bacterial strains used in this study.

| <b>Bacterial species</b>   | <b>Strain number in our Lab</b> |
|----------------------------|---------------------------------|
| <i>B. vulgatus</i>         | Bv011                           |
| <i>B. uniformis</i>        | Bu006                           |
| <i>B. ovatus</i>           | Bo003                           |
| <i>B. caccae</i>           | Bc001                           |
| <i>B. thetaiotaomicron</i> | Bt015                           |
| <i>B. fingoldii</i>        | Bf007                           |
| <i>B. stercoris</i>        | Bs003                           |
| <i>P. distasonis</i>       | Pd002                           |
| <i>P. johnsonii</i>        | Pj010                           |
| <i>P. goldsteinii</i>      | Pg005                           |
